# Supplementary material for: Sources and sinks of methane in sea ice
Source: Oxford University Press journal article supplement (doi:10.1525/elementa.2020.00167), 2021-01-01
Supplement: capeevans_barrow_dataset_supplementary.xlsx [file capeevans_barrow_dataset_supplementary.xlsx]

## Sheet: CH4
Study site	Date	Latitude	Longitude	Mid-depth (cm)	Upper-depth (cm)	Lower-depth (cm)	CH4 (nM)	Standard deviation	Brine volume fraction normalized (%)	CH4 brines (nM)	LN(CH4 brines) (nM)
Cape Evans	2012-09-19	-77.633	166.383	2.5	0	5	3.55	0.0142	3.69384	96.1061	4.56545
Cape Evans	2012-09-19	-77.633	166.383	7.5	5	10	3.24	0.01296	3.55434	91.1562	4.51257
Cape Evans	2012-09-19	-77.633	166.383	12.5	10	15	2.68	0.01072	3.42295	78.2951	4.36049
Cape Evans	2012-09-19	-77.633	166.383	17.5	15	20	2.78	0.01112	3.06473	90.7096	4.50766
Cape Evans	2012-09-19	-77.633	166.383	22.5	20	25	7.36	0.02944	3.27226	224.921	5.41575
Cape Evans	2012-09-19	-77.633	166.383	27.5	25	30	3.27	0.01308	3.09829	105.542	4.65911
Cape Evans	2012-09-19	-77.633	166.383	31.75	30	35	2.35	0.0094	2.85171	82.4066	4.41167
Cape Evans	2012-09-19	-77.633	166.383	37.5	35	40	3.59	0.01436	2.65377	135.279	4.90734
Cape Evans	2012-09-19	-77.633	166.383	42.5	40	45	2.68	0.01072	2.40479	111.444	4.71352
Cape Evans	2012-09-19	-77.633	166.383	47.5	45	50	2.34	0.00936	2.74144	85.3567	4.44684
Cape Evans	2012-09-19	-77.633	166.383	52.5	50	55	2.96	0.01184	2.49418	118.676	4.7764
Cape Evans	2012-09-19	-77.633	166.383	57.5	55	60	2.69	0.01076	2.74178	98.1114	4.5861
Cape Evans	2012-09-19	-77.633	166.383	62.5	60	65	2.13	0.00852	2.83116	75.2341	4.3206
Cape Evans	2012-09-19	-77.633	166.383	67.25	65	70	2.81	0.01124	3.11164	90.306	4.5032
Cape Evans	2012-09-19	-77.633	166.383	71.75	70	74	2.56	0.01024	3.78579	67.6213	4.21392
Cape Evans	2012-09-19	-77.633	166.383	76.5	74	79	3.06	0.01224	2.64315	115.771	4.75161
Cape Evans	2012-09-19	-77.633	166.383	80	79	81	3.32	0.01328	3.3863	98.0421	4.5854
Cape Evans	2012-09-19	-77.633	166.383	83.5	81	86	2.22	0.00888	3.6476	60.8619	4.10861
Cape Evans	2012-09-19	-77.633	166.383	88.5	86	91	2.13	0.00852	2.68356	79.3721	4.37415
Cape Evans	2012-09-19	-77.633	166.383	93.5	91	96	2.26	0.00904	2.5411	88.938	4.48794
Cape Evans	2012-09-19	-77.633	166.383	98.5	96	101	2.48	0.00992	2.84144	87.2797	4.46912
Cape Evans	2012-09-19	-77.633	166.383	103.5	101	106	2	0.008	3.09041	64.7163	4.17001
Cape Evans	2012-09-19	-77.633	166.383	108.5	106	111	2.24	0.00896	3.51507	63.7256	4.15459
Cape Evans	2012-09-19	-77.633	166.383	113.5	111	116	2.08	0.00832	4.15959	50.0049	3.91212
Cape Evans	2012-09-19	-77.633	166.383	118.5	116	121	2.25	0.009	4.89829	45.9344	3.82721
Cape Evans	2012-09-19	-77.633	166.383	123.5	121	126	2.23	0.00892	5.05034	44.1554	3.78772
Cape Evans	2012-09-19	-77.633	166.383	128.5	126	131	2.31	0.00924	5.83322	39.6008	3.67885
Cape Evans	2012-09-19	-77.633	166.383	133.5	131	136	1.79	0.00716	7.39144	24.2172	3.18706
Cape Evans	2012-09-19	-77.633	166.383	138.5	136	141	1.99	0.00796	10.3216	19.28	2.95907
Cape Evans	2012-09-19	-77.633	166.383	143.5	141	146	2.71	0.01084	20.7	13.0918	2.57199
Cape Evans	2012-11-07	-77.633	166.383	2.5	0	5	3.34	0.01336	5.66891	58.9178	4.07614
Cape Evans	2012-11-07	-77.633	166.383	7.5	5	10	2.04	0.00816	5.61011	36.3629	3.59355
Cape Evans	2012-11-07	-77.633	166.383	12.5	10	15	2.39	0.00956	5.41685	44.1216	3.78695
Cape Evans	2012-11-07	-77.633	166.383	17.5	15	20	2.37	0.00948	5.14101	46.0999	3.83081
Cape Evans	2012-11-07	-77.633	166.383	22.5	20	25	3.24	0.01296	5.86685	55.2255	4.01142
Cape Evans	2012-11-07	-77.633	166.383	27.5	25	30	3.42	0.01368	5.10262	67.0244	4.20506
Cape Evans	2012-11-07	-77.633	166.383	32.5	30	35	2.45	0.0098	4.52135	54.1874	3.99245
Cape Evans	2012-11-07	-77.633	166.383	37.5	35	40	2.27	0.00908	4.33848	52.3224	3.95743
Cape Evans	2012-11-07	-77.633	166.383	42.5	40	45	3.53	0.01412	3.78539	93.2532	4.53532
Cape Evans	2012-11-07	-77.633	166.383	47.5	45	50	2.72	0.01088	4.23596	64.2122	4.16219
Cape Evans	2012-11-07	-77.633	166.383	52.5	50	55	1.69	0.00676	4.46461	37.8533	3.63372
Cape Evans	2012-11-07	-77.633	166.383	57.5	55	60	1.9	0.0076	4.54082	41.8426	3.73392
Cape Evans	2012-11-07	-77.633	166.383	62.5	60	65	1.65	0.0066	4.93708	33.4206	3.50917
Cape Evans	2012-11-07	-77.633	166.383	67.5	65	70	1.73	0.00692	3.52697	49.0507	3.89285
Cape Evans	2012-11-07	-77.633	166.383	72.5	70	75	2.15	0.0086	4.00449	53.6897	3.98322
Cape Evans	2012-11-07	-77.633	166.383	77.5	75	80	1.54	0.00616	4.34775	35.4206	3.56729
Cape Evans	2012-11-07	-77.633	166.383	82	80	84	2.49	0.00996	4.43472	56.1479	4.02799
Cape Evans	2012-11-07	-77.633	166.383	86	84	88	4.11	0.01644	4.48798	91.578	4.51719
Cape Evans	2012-11-07	-77.633	166.383	90.5	88	93	3.26	0.01304	4.40303	74.0399	4.3046
Cape Evans	2012-11-07	-77.633	166.383	95.5	93	98	2.76	0.01104	4.11315	67.1019	4.20621
Cape Evans	2012-11-07	-77.633	166.383	100.5	98	103	5.61	0.02244	4.48436	125.101	4.82912
Cape Evans	2012-11-07	-77.633	166.383	105.5	103	108	2.06	0.00824	4.99775	41.2185	3.71889
Cape Evans	2012-11-07	-77.633	166.383	110.5	108	113	4.35	0.0174	5.19101	83.7987	4.42842
Cape Evans	2012-11-07	-77.633	166.383	115.5	113	118	2.78	0.01112	5.28951	52.5568	3.96189
Cape Evans	2012-11-07	-77.633	166.383	120.5	118	123	2.03	0.00812	4.91629	41.2913	3.72065
Cape Evans	2012-11-07	-77.633	166.383	125.5	123	128	2.51	0.01004	5.20618	48.2119	3.87561
Cape Evans	2012-11-07	-77.633	166.383	130.5	128	133	2.25	0.009	5.49607	40.9384	3.71207
Cape Evans	2012-11-07	-77.633	166.383	135.5	133	138	3.92	0.01568	5.85028	67.0053	4.20477
Cape Evans	2012-11-07	-77.633	166.383	140.5	138	143	2.05	0.0082	6.17584	33.1939	3.50236
Cape Evans	2012-11-07	-77.633	166.383	145.5	143	148	2.04	0.00816	6.86011	29.7371	3.3924
Cape Evans	2012-11-07	-77.633	166.383	150.5	148	153	2.05	0.0082	8.87079	23.1096	3.14025
Cape Evans	2012-11-07	-77.633	166.383	155.5	153	158	2.18	0.00872	11.1826	19.4946	2.97014
Cape Evans	2012-11-07	-77.633	166.383	160.5	158	163	2.19	0.00876	14.6815	14.9168	2.70249
Cape Evans	2012-11-07	-77.633	166.383	165.5	163	168	5.34	0.02136	12.5697	42.4832	3.74911
Cape Evans	2012-11-07	-77.633	166.383	170.5	168	173	2.65	0.0106	16.2433	16.3145	2.79205
Cape Evans	2012-11-07	-77.633	166.383	175.5	173	178	4.21	0.01684	30.2	13.9404	2.63479
Cape Evans	2012-11-30	-77.633	166.383	2.5	0	5	2.57	0.01028	12.6756	20.2752	3.0094
Cape Evans	2012-11-30	-77.633	166.383	7.5	5	10	2.91	0.01164	9.89738	29.4017	3.38105
Cape Evans	2012-11-30	-77.633	166.383	12.5	10	15	2.33	0.00932	9.84797	23.6597	3.16377
Cape Evans	2012-11-30	-77.633	166.383	17.5	15	20	2.7	0.0108	11.0404	24.4556	3.19686
Cape Evans	2012-11-30	-77.633	166.383	22.5	20	25	2.26	0.00904	13.0823	17.2753	2.84928
Cape Evans	2012-11-30	-77.633	166.383	27.5	25	30	2.44	0.00976	11.652	20.9405	3.04169
Cape Evans	2012-11-30	-77.633	166.383	32.5	30	35	2.51	0.01004	11.2567	22.2979	3.10449
Cape Evans	2012-11-30	-77.633	166.383	37.5	35	40	2.37	0.00948	11.6608	20.3246	3.01183
Cape Evans	2012-11-30	-77.633	166.383	42.5	40	45	2.01	0.00804	11.3555	17.7006	2.8736
Cape Evans	2012-11-30	-77.633	166.383	47.5	45	50	2.99	0.01196	10.5257	28.4066	3.34662
Cape Evans	2012-11-30	-77.633	166.383	52.5	50	55	2.64	0.01056	10.0282	26.3258	3.27055
Cape Evans	2012-11-30	-77.633	166.383	57.5	55	60	3.26	0.01304	11.0814	29.4187	3.38163
Cape Evans	2012-11-30	-77.633	166.383	62.5	60	65	2.35	0.0094	13.2834	17.6912	2.87307
Cape Evans	2012-11-30	-77.633	166.383	67.5	65	70	3.12	0.01248	14.4413	21.6047	3.07291
Cape Evans	2012-11-30	-77.633	166.383	72.5	70	75	3.46	0.01384	13.6608	25.328	3.23191
Cape Evans	2012-11-30	-77.633	166.383	77.5	75	80	2.17	0.00868	11.2436	19.2999	2.9601
Cape Evans	2012-11-30	-77.633	166.383	82.5	80	85	2.33	0.00932	14.082	16.546	2.80614
Cape Evans	2012-11-30	-77.633	166.383	86	85	87	7.22	0.02888	12.8	56.4062	4.03258
Cape Evans	2012-11-30	-77.633	166.383	89.5	87	92	2.27	0.00908	12.1195	18.7302	2.93014
Cape Evans	2012-11-30	-77.633	166.383	94.5	92	97	2.87	0.01148	8.25116	34.783	3.54913
Cape Evans	2012-11-30	-77.633	166.383	99.5	97	102	2.51	0.01004	11.8564	21.17	3.05259
Cape Evans	2012-11-30	-77.633	166.383	104.5	102	107	1.84	0.00736	8.58198	21.4403	3.06527
Cape Evans	2012-11-30	-77.633	166.383	109.5	107	112	2.23	0.00892	10.8203	20.6093	3.02574
Cape Evans	2012-11-30	-77.633	166.383	114.5	112	117	2.68	0.01072	14.4828	18.5046	2.91802
Cape Evans	2012-11-30	-77.633	166.383	119.5	117	122	2.1	0.0084	8.10552	25.9083	3.25456
Cape Evans	2012-11-30	-77.633	166.383	124.5	122	127	2.06	0.00824	11.4326	18.0187	2.89141
Cape Evans	2012-11-30	-77.633	166.383	129.5	127	132	1.95	0.0078	10.7965	18.0614	2.89378
Cape Evans	2012-11-30	-77.633	166.383	134.5	132	137	2.51	0.01004	8.76163	28.6476	3.35507
Cape Evans	2012-11-30	-77.633	166.383	139.5	137	142	2.3	0.0092	10.4949	21.9154	3.08719
Cape Evans	2012-11-30	-77.633	166.383	144.5	142	147	2.15	0.0086	12.8521	16.7287	2.81713
Cape Evans	2012-11-30	-77.633	166.383	149.5	147	152	2.78	0.01112	14.3271	19.4038	2.96547
Cape Evans	2012-11-30	-77.633	166.383	154.5	152	157	2.4	0.0096	17.5889	13.645	2.61337
Cape Evans	2012-11-30	-77.633	166.383	159.5	157	162	2.52	0.01008	12.0854	20.8516	3.03743
Cape Evans	2012-11-30	-77.633	166.383	164.5	162	167	3.06	0.01224	11.6137	26.3481	3.2714
Cape Evans	2012-11-30	-77.633	166.383	169.5	167	172	4.16	0.01664	25.2064	16.5038	2.80359
Barrow	2009-04-03	71.3665	-156.541	2.5	0	5	4.75	0.019	2.62916	180.666	5.19665
Barrow	2009-04-03	71.3665	-156.541	7.5	5	10	4.5	0.018	3.50498	128.389	4.85506
Barrow	2009-04-03	71.3665	-156.541	12.5	10	15	4.58	0.01832	2.11809	216.233	5.37636
Barrow	2009-04-03	71.3665	-156.541	17.5	15	20	8.52	0.03408	1.88868	451.108	6.11171
Barrow	2009-04-03	71.3665	-156.541	22.5	20	25	5.01	0.02004	1.97358	253.853	5.53675
Barrow	2009-04-03	71.3665	-156.541	27.5	25	30	5.39	0.02156	2.13717	252.203	5.53023
Barrow	2009-04-03	71.3665	-156.541	32.5	30	35	5.54	0.02216	2.09341	264.64	5.57837
Barrow	2009-04-03	71.3665	-156.541	37.5	35	40	5.67	0.02268	1.94912	290.9	5.67298
Barrow	2009-04-03	71.3665	-156.541	42.5	40	45	5.79	0.02316	2.20369	262.741	5.57117
Barrow	2009-04-03	71.3665	-156.541	47.5	45	50	5.32	0.02128	2.39027	222.569	5.40524
Barrow	2009-04-03	71.3665	-156.541	52.5	50	55	4.85	0.0194	2.07431	233.812	5.45452
Barrow	2009-04-03	71.3665	-156.541	57.5	55	60	4.38	0.01752	2.52212	173.664	5.15712
Barrow	2009-04-03	71.3665	-156.541	62.5	60	65	6.91	0.02764	3.38945	203.868	5.31747
Barrow	2009-04-03	71.3665	-156.541	67.5	65	70	6.78	0.02712	3.26921	207.389	5.3346
Barrow	2009-04-03	71.3665	-156.541	72.5	70	75	6.16	0.02464	3.10099	198.646	5.29153
Barrow	2009-04-03	71.3665	-156.541	77.5	75	80	6.34	0.02536	3.11324	203.647	5.31639
Barrow	2009-04-03	71.3665	-156.541	82.5	80	85	6.33	0.02532	3.59063	176.292	5.17214
Barrow	2009-04-03	71.3665	-156.541	87.5	85	90	6.42	0.02568	4.52548	141.863	4.95486
Barrow	2009-04-03	71.3665	-156.541	92.5	90	95	8.43	0.03372	5.87136	143.578	4.96688
Barrow	2009-04-03	71.3665	-156.541	97.5	95	100	9.18	0.03672	6.13918	149.531	5.00751
Barrow	2009-04-03	71.3665	-156.541	102.5	100	105	9.94	0.03976	8.54624	116.308	4.75625
Barrow	2009-04-03	71.3665	-156.541	107.5	105	110	9.31	0.03724	8.81755	105.585	4.65951
Barrow	2009-04-03	71.3665	-156.541	112.5	110	115	8.84	0.03536	11.6486	75.889	4.32927
Barrow	2009-04-03	71.3665	-156.541	117.5	115	120	8.91	0.03564	18.4085	48.4016	3.87953
Barrow	2009-05-08	71.3665	-156.541	8	0	16	3.65	0.16	7.29901	50.0068	3.91216
Barrow	2009-05-08	71.3665	-156.541	22.5	16	29	4.36	0.16	6.40737	68.0467	4.22019
Barrow	2009-05-08	71.3665	-156.541	35.5	29	42	6.42	0.16	7.54951	85.0386	4.44311
Barrow	2009-05-08	71.3665	-156.541	48.5	42	55	7.33	0.16	9.20727	79.611	4.37715
Barrow	2009-05-08	71.3665	-156.541	61.5	55	68	6.1	0.16	9.04841	67.4151	4.21087
Barrow	2009-05-08	71.3665	-156.541	74.5	68	81	4.66	0.16	10.405	44.7863	3.8019
Barrow	2009-05-08	71.3665	-156.541	89	81	97	4.42	0.16	9.56468	46.2117	3.83323
Barrow	2009-05-08	71.3665	-156.541	104	97	111	7.93	0.16	13.2256	59.9595	4.09367
Barrow	2009-05-08	71.3665	-156.541	119	111	127			19.5729
Barrow	2009-06-05	71.3665	-156.541	2.5	0	5	6.17121	0.0246848
Barrow	2009-06-05	71.3665	-156.541	7.5	5	10	6.24509	0.0249804
Barrow	2009-06-05	71.3665	-156.541	12.5	10	15	3.42416	0.0136967	26.0216	13.1589	2.5771
Barrow	2009-06-05	71.3665	-156.541	26	23.5	28.5	4.55044	0.0182017	21.5023	21.1626	3.05223
Barrow	2009-06-05	71.3665	-156.541	31	28.5	33.5	5.30359	0.0212143	16.4737	32.1943	3.47179
Barrow	2009-06-05	71.3665	-156.541	36	33.5	38.5	5.22746	0.0209098	13.2701	39.3928	3.67358
Barrow	2009-06-05	71.3665	-156.541	50.75	48.5	53	5.00265	0.0200106	15.2528	32.7982	3.49037
Barrow	2009-06-05	71.3665	-156.541	55.25	53	57.5	4.64576	0.018583	13.8747	33.4837	3.51106
Barrow	2009-06-05	71.3665	-156.541	64	61.5	66.5	5.32369	0.0212948	12.7572	41.7308	3.73124
Barrow	2009-06-05	71.3665	-156.541	69	66.5	71.5	4.52114	0.0180846	11.8801	38.0563	3.63907
Barrow	2009-06-05	71.3665	-156.541	84	81.5	86.5	4.81742	0.0192697	10.8867	44.2506	3.78987
Barrow	2009-06-05	71.3665	-156.541	89	86.5	91.5	5.60111	0.0224044	11.7052	47.8514	3.8681
Barrow	2009-06-05	71.3665	-156.541	94	91.5	96.5	6.04526	0.024181	12.0662	50.1006	3.91403
Barrow	2009-06-05	71.3665	-156.541	99	96.5	101.5	6.67385	0.0266954	12.5155	53.3246	3.9764
Barrow	2009-06-05	71.3665	-156.541	104	101.5	106.5	7.21874	0.028875	13.5892	53.121	3.97257
Barrow	2009-06-05	71.3665	-156.541	109	106.5	111.5	6.98174	0.027927	11.7421	59.4593	4.08529
Barrow	2009-06-05	71.3665	-156.541	114	111.5	116.5	8.86129	0.0354452	10.1991	86.8828	4.46456
Barrow	2009-06-05	71.3665	-156.541	119	116.5	121.5	4.42073	0.0176829	10.5148	42.043	3.73869
Barrow	2009-06-05	71.3665	-156.541	124	121.5	126.5	5.67389	0.0226956	11.6194	48.8311	3.88837
Barrow	2009-06-05	71.3665	-156.541	129	126.5	131.5	7.84058	0.0313623	12.6955	61.7587	4.12323
Barrow	2009-06-05	71.3665	-156.541	134	131.5	136.5	7.22371	0.0288948	12.7296	56.7473	4.03861
Barrow	2009-06-05	71.3665	-156.541	139	136.5	141.5	4.46867	0.0178747	18.6813	23.9205	3.17474

## Sheet: Physics
Study site	Date	Latitude	Longitude	Mid-depth (cm)	Upper-depth (cm)	Lower-depth (cm)	Temperature (°C)	Salinity (psu)	Brine salinity (psu)	Brine volume fraction (%)	Solubility in brines (nM)	Solubility in bulk (nM)
Cape Evans	2012-09-19	-77.633	166.383	2.5	0	5	-19.8	13	208.326	3.73078	1.85314	0.0691367
Cape Evans	2012-09-19	-77.633	166.383	7.5	5	10	-18.7	11.5	201.493	3.50069	1.8861	0.0660264
Cape Evans	2012-09-19	-77.633	166.383	12.5	10	15	-18.6	11.3	200.883	3.45823	1.88896	0.0653247
Cape Evans	2012-09-19	-77.633	166.383	17.5	15	20	-18.2	9.7	198.459	3.03074	1.9003	0.0575932
Cape Evans	2012-09-19	-77.633	166.383	22.5	20	25	-17.5	10.1	194.253	3.28291	1.91989	0.0630284
Cape Evans	2012-09-19	-77.633	166.383	27.5	25	30	-16.8	9.5	190.062	3.21136	1.93968	0.0622903
Cape Evans	2012-09-19	-77.633	166.383	32.5	30	35	-16.4	8.5	187.661	2.93754	1.9513	0.0573204
Cape Evans	2012-09-19	-77.633	166.383	37.5	35	40	-16.2	7.6	186.455	2.65494	1.95724	0.0519636
Cape Evans	2012-09-19	-77.633	166.383	42.5	40	45	-15.3	7.1	180.963	2.61464	1.98549	0.0519133
Cape Evans	2012-09-19	-77.633	166.383	47.5	45	50	-14.7	6.5	177.215	2.48124	2.00614	0.0497773
Cape Evans	2012-09-19	-77.633	166.383	52.5	50	55	-14.2	6.8	174.019	2.67878	2.02481	0.0542403
Cape Evans	2012-09-19	-77.633	166.383	57.5	55	60	-13.5	6.2	169.407	2.55323	2.05365	0.0524344
Cape Evans	2012-09-19	-77.633	166.383	62.5	60	65	-13.1	6.9	166.686	2.91995	2.07178	0.0604948
Cape Evans	2012-09-19	-77.633	166.383	67.5	65	70	-12.6	6.7	163.186	2.93294	2.09636	0.0614851
Cape Evans	2012-09-19	-77.633	166.383	72.5	70	75	-11.9	7	158.076	3.22138	2.13486	0.0687721
Cape Evans	2012-09-19	-77.633	166.383	77.5	75	80	-11.5	7.6	155.034	3.60487	2.15927	0.0778389
Cape Evans	2012-09-19	-77.633	166.383	82.5	80	85	-12.4	6.6	161.752	2.92942	2.10685	0.0617184
Cape Evans	2012-09-19	-77.633	166.383	87.5	85	90	-11.5	8.2	155.034	3.89206	2.15927	0.0840402
Cape Evans	2012-09-19	-77.633	166.383	92.5	90	95	-10.8	5.6	149.471	2.79764	2.20676	0.0617373
Cape Evans	2012-09-19	-77.633	166.383	97.5	95	100	-10	4.5	142.7	2.39882	2.26949	0.054441
Cape Evans	2012-09-19	-77.633	166.383	102.5	100	105	-9.1	4.8	134.491	2.77622	2.35265	0.0653148
Cape Evans	2012-09-19	-77.633	166.383	107.5	105	110	-8.6	4.8	129.633	2.9153	2.40547	0.0701267
Cape Evans	2012-09-19	-77.633	166.383	112.5	110	115	-8.1		124.5		2.46446
Cape Evans	2012-09-19	-77.633	166.383	117.5	115	120	-7	5.1	112.474	3.71109	2.61297	0.0969697
Cape Evans	2012-09-19	-77.633	166.383	122.5	120	125	-5.7	5	96.4981	4.37573	2.83533	0.124066
Cape Evans	2012-09-19	-77.633	166.383	127.5	125	130	-4.7	4.8	82.8073	5.01972	3.04861	0.153031
Cape Evans	2012-09-19	-77.633	166.383	132.5	130	135	-4.4	4.8	78.4444	5.34185	3.1211	0.166724
Cape Evans	2012-09-19	-77.633	166.383	137.5	135	140	-3.7	4.7	67.7805	6.17626	3.3078	0.204298
Cape Evans	2012-09-19	-77.633	166.383	142.5	140	145	-2.9	4.7	54.7253	7.86374	3.5554	0.279587
Cape Evans	2012-09-19	-77.633	166.383	147.5	145	150	-2.4	5.5	46.0726	11.1979	3.73158	0.41786
Cape Evans	2012-09-19	-77.633	166.383	152.5	150	155	-2.2	9.2	42.5016	20.7406	3.80721	0.789638
Cape Evans	2012-11-07	-77.633	166.383	2.5	0	5	-10.2	10.7	144.437	5.64848	2.25289	0.127254
Cape Evans	2012-11-07	-77.633	166.383	7.5	5	10	-10.1	10.6	143.572	5.64278	2.26111	0.127589
Cape Evans	2012-11-07	-77.633	166.383	12.5	10	15	-10.2	10.3	144.437	5.43477	2.25289	0.122439
Cape Evans	2012-11-07	-77.633	166.383	17.5	15	20	-9.8	9.6	140.932	5.23887	2.28675	0.1198
Cape Evans	2012-11-07	-77.633	166.383	22.5	20	25	-9.4	10.1	137.302	5.71712	2.32332	0.132827
Cape Evans	2012-11-07	-77.633	166.383	27.5	25	30	-9.3	8	136.373	4.55878	2.33291	0.106352
Cape Evans	2012-11-07	-77.633	166.383	32.5	30	35	-8.9	7.7	132.574	4.5562	2.37318	0.108127
Cape Evans	2012-11-07	-77.633	166.383	37.5	35	40		7
Cape Evans	2012-11-07	-77.633	166.383	42.5	40	45	-8.7	6.4	130.622	3.85603	2.3945	0.0923327
Cape Evans	2012-11-07	-77.633	166.383	47.5	45	50	-8.2	6.7	125.581	4.25152	2.45154	0.104228
Cape Evans	2012-11-07	-77.633	166.383	52.5	50	55	-7.8	6.8	121.375	4.50833	2.50128	0.112766
Cape Evans	2012-11-07	-77.633	166.383	57.5	55	60	-7.8	7	121.375	4.64215	2.50128	0.116113
Cape Evans	2012-11-07	-77.633	166.383	62.5	60	65	-7.6	6.8	119.212	4.61228	2.52762	0.116581
Cape Evans	2012-11-07	-77.633	166.383	67.5	65	70	-7.2	5.4	114.763	3.8342	2.58342	0.0990535
Cape Evans	2012-11-07	-77.633	166.383	72.5	70	75	-6.6	5.7	107.766	4.37441	2.67557	0.117041
Cape Evans	2012-11-07	-77.633	166.383	77.5	75	80	-6.8	5.9	110.142	4.41013	2.64367	0.116589
Cape Evans	2012-11-07	-77.633	166.383	82.5	80	85	-6.4	5.7	105.344	4.49667	2.70873	0.121802
Cape Evans	2012-11-07	-77.633	166.383	87.5	85	90	-6.2	5.4	102.876	4.38151	2.74317	0.120193
Cape Evans	2012-11-07	-77.633	166.383	92.5	90	95	-6.2	5	102.876	4.05459	2.74317	0.111224
Cape Evans	2012-11-07	-77.633	166.383	94.5				4.8
Cape Evans	2012-11-07	-77.633	166.383	99.5	97	102		5.1
Cape Evans	2012-11-07	-77.633	166.383	104.5	102	107	-4.9	5.1	85.649	5.13209	3.00258	0.154095
Cape Evans	2012-11-07	-77.633	166.383	109.5	107	112	-4.6	5	81.3665	5.33745	3.0723	0.163983
Cape Evans	2012-11-07	-77.633	166.383	114.5	112	117	-4.3	4.7	76.9629	5.34502	3.14623	0.168167
Cape Evans	2012-11-07	-77.633	166.383	119.5	117	122	-4	4.2	72.4352	5.11365	3.22463	0.164896
Cape Evans	2012-11-07	-77.633	166.383	124.5	122	127	-3.7	4.1	67.7805	5.38155	3.3078	0.178011
Cape Evans	2012-11-07	-77.633	166.383	129.5	127	132		4.4
Cape Evans	2012-11-07	-77.633	166.383	134.5	132	137	-3.4	4.3	62.996	6.13342	3.39606	0.208295
Cape Evans	2012-11-07	-77.633	166.383	139.5	137	142	-3.2	4.2	59.7327	6.35991	3.45789	0.219919
Cape Evans	2012-11-07	-77.633	166.383	144.5	142	147	-2.8	4.9	53.0258	8.49911	3.58922	0.305052
Cape Evans	2012-11-07	-77.633	166.383	149.5	147	152	-2.6	5.6	49.5804	10.4961	3.65896	0.384048
Cape Evans	2012-11-07	-77.633	166.383	154.5	152	157	-1.9	5.7	37.0245	14.9643	3.92661	0.587591
Cape Evans	2012-11-07	-77.633	166.383	159.5	157	162	-2	5	38.8664	12.3331	3.88599	0.479262
Cape Evans	2012-11-07	-77.633	166.383	164.5	162	167	-1.8	5.6	35.1662	15.5084	3.96807	0.615383
Cape Evans	2012-11-07	-77.633	166.383	169.5	167	172	-2	12	38.8664	30.2375	3.88599	1.17503
Cape Evans	2012-11-30	-77.633	166.383	2.5	0	5	-2.1	5.4	40.6921	12.6556	3.8462	0.486759
Cape Evans	2012-11-30	-77.633	166.383	7.5	5	10	-3.3	6.7	61.3718	9.89205	3.42667	0.338968
Cape Evans	2012-11-30	-77.633	166.383	12.5	10	15	-3.6	7.2	66.2002	9.76577	3.33664	0.325848
Cape Evans	2012-11-30	-77.633	166.383	17.5	15	20	-3.4	7.6	62.996	10.914	3.39606	0.370646
Cape Evans	2012-11-30	-77.633	166.383	22.5	20	25	-3.1	8.4	58.0787	13.2495	3.48974	0.462374
Cape Evans	2012-11-30	-77.633	166.383	27.5	25	30	-3	7.2	56.4096	11.7069	3.52224	0.412347
Cape Evans	2012-11-30	-77.633	166.383	32.5	30	35	-3	6.9	56.4096	11.2116	3.52224	0.394901
Cape Evans	2012-11-30	-77.633	166.383	37.5	35	40	-2.7	6.5	51.3108	11.7452	3.62374	0.425615
Cape Evans	2012-11-30	-77.633	166.383	42.5	40	45	-2.6	6.1	49.5804	11.4473	3.65896	0.418854
Cape Evans	2012-11-30	-77.633	166.383	47.5	45	50		6.2
Cape Evans	2012-11-30	-77.633	166.383	52.5	50	55	-2.9	5.9	54.7253	9.89851	3.5554	0.351931
Cape Evans	2012-11-30	-77.633	166.383	57.5	55	60	-2.8	6.1	53.0258	10.6102	3.58922	0.380824
Cape Evans	2012-11-30	-77.633	166.383	62.5	60	65	-2.2	5.8	42.5016	12.9512	3.80721	0.493079
Cape Evans	2012-11-30	-77.633	166.383	67.5	65	70	-1.7	4.9	33.2915	14.3333	4.0104	0.574822
Cape Evans	2012-11-30	-77.633	166.383	72.5	70	75	-1.6	4.8	31.4003	14.9161	4.05361	0.604641
Cape Evans	2012-11-30	-77.633	166.383	77.5	75	80	-2.3	4.7	44.2951	9.98389	3.76901	0.376294
Cape Evans	2012-11-30	-77.633	166.383	82.5	80	85	-1.6	4.7	31.4003	14.6001	4.05361	0.591831
Cape Evans	2012-11-30	-77.633	166.383	87.5	85	90	-1.7	4.4	33.2915	12.8486	4.0104	0.515282
Cape Evans	2012-11-30	-77.633	166.383	92.5	90	95	-1.7	3.9	33.2915	11.3691	4.0104	0.455946
Cape Evans	2012-11-30	-77.633	166.383	97.5	95	100	-1.9	3.4	37.0245	8.86166	3.92661	0.347963
Cape Evans	2012-11-30	-77.633	166.383	102.5	100	105	-1.8	4.1	35.1662	11.2985	3.96807	0.448334
Cape Evans	2012-11-30	-77.633	166.383	107.5	105	110	-2	3.7	38.8664	9.09085	3.88599	0.35327
Cape Evans	2012-11-30	-77.633	166.383	112.5	110	115	-1.8	4.1	35.1662	11.2985	3.96807	0.448334
Cape Evans	2012-11-30	-77.633	166.383	117.5	115	120	-1.4	3.8	27.5676	13.4613	4.14278	0.557671
Cape Evans	2012-11-30	-77.633	166.383	122.5	120	125	-1.9	3.3	37.0245	8.59832	3.92661	0.337623
Cape Evans	2012-11-30	-77.633	166.383	127.5	125	130	-1.4	3.2	27.5676	11.3087	4.14278	0.468495
Cape Evans	2012-11-30	-77.633	166.383	132.5	130	135	-1.7	3.6	33.2915	10.4838	4.0104	0.420442
Cape Evans	2012-11-30	-77.633	166.383	137.5	135	140	-1.8	3.1	35.1662	8.51488	3.96807	0.337877
Cape Evans	2012-11-30	-77.633	166.383	142.5	140	145		3.2
Cape Evans	2012-11-30	-77.633	166.383	147.5	145	150	-1.3	3.4	25.626	12.9627	4.18877	0.542978
Cape Evans	2012-11-30	-77.633	166.383	152.5	150	155	-1.4	4.1	27.5676	14.5414	4.14278	0.602419
Cape Evans	2012-11-30	-77.633	166.383	157.5	155	160	-1.5	5.2	29.4923	17.2719	4.09773	0.707758
Cape Evans	2012-11-30	-77.633	166.383	162.5	160	165	-1.6	3.9	31.4003	12.0802	4.05361	0.489684
Cape Evans	2012-11-30	-77.633	166.383	167.5	165	170	-1.7	4.1	33.2915	11.9603	4.0104	0.479656
Cape Evans	2012-11-30	-77.633	166.383	172.5	170	175	-1.8	9	35.1662	25.2064	3.96807	1.00021
Barrow	2009-04-03	71.3665	-156.541	2.5	0	5	-14.4	6.8	210.188	2.64534	1.51649	0.0401162
Barrow	2009-04-03	71.3665	-156.541	7.5	5	10	-13.7	8.4	202.035	3.4222	1.58576	0.0542678
Barrow	2009-04-03	71.3665	-156.541	12.5	10	15	-14.4	5.4	210.188	2.09776	1.51649	0.0318122
Barrow	2009-04-03	71.3665	-156.541	17.5	15	20	-14.4	4.9	210.188	1.90256	1.51649	0.0288521
Barrow	2009-04-03	71.3665	-156.541	22.5	20	25	-13	4.7	193.712	1.99774	1.65993	0.0331612
Barrow	2009-04-03	71.3665	-156.541	27.5	25	30	-12.1	4.7	182.752	2.12658	1.76319	0.0374955
Barrow	2009-04-03	71.3665	-156.541	32.5	30	35	-11.8	4.5	179.032	2.08035	1.79973	0.0374408
Barrow	2009-04-03	71.3665	-156.541	37.5	35	40	-11.5	4.3	175.278	2.03213	1.83741	0.0373385
Barrow	2009-04-03	71.3665	-156.541	45			-11.4	5.1	174.019	2.43058	1.85022	0.0449711
Barrow	2009-04-03	71.3665	-156.541	50			-10.5	4	162.514	2.04355	1.97168	0.0402923
Barrow	2009-04-03	71.3665	-156.541	57.5	55	60	-8.64	4.6	137.689	2.78191	2.26218	0.0629319
Barrow	2009-04-03	71.3665	-156.541	62.5	60	65	-7.4	4.8	120.306	3.3241	2.49097	0.0828023
Barrow	2009-04-03	71.3665	-156.541	67.5	65	70	-7	4.4	114.548	3.19864	2.57175	0.082261
Barrow	2009-04-03	71.3665	-156.541	72.5	70	75	-6.3	3.7	104.287	2.95194	2.72222	0.0803582
Barrow	2009-04-03	71.3665	-156.541	77.5	75	80	-5.7	3.9	95.3018	3.40737	2.86118	0.0974909
Barrow	2009-04-03	71.3665	-156.541	82.5	80	85	-5.2	4.2	87.6749	3.99379	2.98463	0.1192
Barrow	2009-04-03	71.3665	-156.541	87.5	85	90	-4.8	5.8	81.4802	5.95695	3.08877	0.183996
Barrow	2009-04-03	71.3665	-156.541	92.5	90	95	-4.2	4.8	72.0288	5.58349	3.25463	0.181722
Barrow	2009-04-03	71.3665	-156.541	97.5	95	100	-3.3	5.8	57.4813	8.54717	3.52724	0.30148
Barrow	2009-04-03	71.3665	-156.541	102.5	100	105	-2.9	5.1	50.8683	8.54076	3.6585	0.312463
Barrow	2009-04-03	71.3665	-156.541	107.5	105	110	-2.4	5.5	42.4704	11.1979	3.83212	0.429119
Barrow	2009-04-03	71.3665	-156.541	112.5	110	115	-2.1	7.8	37.3599	18.4085	3.94172	0.725611
Barrow	2009-05-08	71.3665	-156.541	2.5	0	5	-4	4.7	68.835	5.7277	3.31264	0.189738
Barrow	2009-05-08	71.3665	-156.541	7.5	5	10	-3.9	6.7	67.2298	8.39809	3.34218	0.280679
Barrow	2009-05-08	71.3665	-156.541	12.5	10	15	-3.7	5.9	64.0028	7.77125	3.40235	0.264405
Barrow	2009-05-08	71.3665	-156.541	17.5	15	20	-3.5	4.3	60.7533	5.96113	3.46403	0.206495
Barrow	2009-05-08	71.3665	-156.541	22.5	20	25	-3.4	4.8	59.1202	6.85361	3.49544	0.239564
Barrow	2009-05-08	71.3665	-156.541	30	27.5	32.5	-3.2	4.9	55.8367	7.43094	3.55944	0.2645
Barrow	2009-05-08	71.3665	-156.541	35	32.5	37.5	-3.1	4.7	54.1863	7.35384	3.59205	0.264154
Barrow	2009-05-08	71.3665	-156.541	40	37.5	42.5	-2.9	4.7	50.8683	7.86374	3.6585	0.287695
Barrow	2009-05-08	71.3665	-156.541	45	42.5	47.5	-2.7	4.9	47.5268	8.82016	3.72663	0.328695
Barrow	2009-05-08	71.3665	-156.541	50	47.5	52.5	-2.2	4.5	39.0694	10.0119	3.90472	0.390937
Barrow	2009-05-08	71.3665	-156.541	55	52.5	57.5	-2.6	4.7	45.8473	8.78974	3.76135	0.330613
Barrow	2009-05-08	71.3665	-156.541	60	57.5	62.5	-2.6	4.6	45.8473	8.60061	3.76135	0.323499
Barrow	2009-05-08	71.3665	-156.541	65	62.5	67.5	-2.4	4.8	42.4704	9.7549	3.83212	0.37382
Barrow	2009-05-08	71.3665	-156.541	70	67.5	72.5	-2.3	6.4	40.7729	13.6577	3.86819	0.528304
Barrow	2009-05-08	71.3665	-156.541	75	72.5	77.5	-2.4	4.6	42.4704	9.34357	3.83212	0.358057
Barrow	2009-05-08	71.3665	-156.541	80	77.5	82.5	-2.2	3.7	39.0694	8.21369	3.90472	0.320722
Barrow	2009-05-08	71.3665	-156.541	85	82.5	87.5	-2.4	3.7	42.4704	7.49788	3.83212	0.287328
Barrow	2009-05-08	71.3665	-156.541	90	87.5	92.5	-2.2	4.9	39.0694	10.914	3.90472	0.426162
Barrow	2009-05-08	71.3665	-156.541	95	92.5	97.5	-2.1	4.4	37.3599	10.2821	3.94172	0.405293
Barrow	2009-05-08	71.3665	-156.541	100	97.5	102.5	-1.9	4.4	33.9225	11.5041	4.01717	0.462141
Barrow	2009-05-08	71.3665	-156.541	105	102.5	107.5	-1.6	4.6	28.7202	14.2843	4.13406	0.590522
Barrow	2009-05-08	71.3665	-156.541	110	107.5	112.5	-1.6	4.5	28.7202	13.9688	4.13406	0.577477
Barrow	2009-05-08	71.3665	-156.541	115	112.5	117.5	-1.7	4.5	30.4605	13.1452	4.09459	0.538241
Barrow	2009-05-08	71.3665	-156.541	120	117.5	122.5	-1.5	4.5	26.9736	14.9073	4.17405	0.622237
Barrow	2009-05-08	71.3665	-156.541	125	122.5	127.5	-1.6	4.9	28.7202	15.2323	4.13406	0.629714
Barrow	2009-05-08	71.3665	-156.541	130	127.5	132.5	-1.4	5.3	25.2207	18.8881	4.21457	0.796051
Barrow	2009-05-08	71.3665	-156.541	135	132.5	137.5	-1.8	10.4	32.1946	29.2638	4.05563	1.18683
Barrow	2009-06-05	71.3665	-156.541	12.5	10	15	-0.1	0.5	1.84468	26.0078	4.79322	1.24661
Barrow	2009-06-05	71.3665	-156.541	17.5	15	20	-0.3	1.5	5.51369	25.4887	4.69749	1.19733
Barrow	2009-06-05	71.3665	-156.541	22.5	20	25	-0.7	2.8	12.7714	20.0688	4.51363	0.905832
Barrow	2009-06-05	71.3665	-156.541	27.5	25	30	-0.9	3.6	16.3607	20.0153	4.42533	0.885742
Barrow	2009-06-05	71.3665	-156.541	32.5	30	35	-1.1	3.5	19.9239	15.8279	4.33935	0.686828
Barrow	2009-06-05	71.3665	-156.541	37.5	35	40	-1.2	3.4	21.6959	14.0621	4.29721	0.604278
Barrow	2009-06-05	71.3665	-156.541	42.5	40	45	-1.2	3.9	21.6959	16.1667	4.29721	0.694717
Barrow	2009-06-05	71.3665	-156.541	47.5	45	50	-1.4	4.3	25.2207	15.263	4.21457	0.643268
Barrow	2009-06-05	71.3665	-156.541	52.5	50	55	-1.5	4.6	26.9736	15.2443	4.17405	0.636305
Barrow	2009-06-05	71.3665	-156.541	57.5	55	60	-1.6	3.9	28.7202	12.0802	4.13406	0.499403
Barrow	2009-06-05	71.3665	-156.541	62.5	60	65	-1.5	3.9	26.9736	12.8903	4.17405	0.538049
Barrow	2009-06-05	71.3665	-156.541	67.5	65	70	-1.6	3.9	28.7202	12.0802	4.13406	0.499403
Barrow	2009-06-05	71.3665	-156.541	72.5	70	75	-1.7	3.7	30.4605	10.7787	4.09459	0.441343
Barrow	2009-06-05	71.3665	-156.541	77.5	75	80	-1.7	3.9	30.4605	11.3691	4.09459	0.465517
Barrow	2009-06-05	71.3665	-156.541	82.5	80	85	-1.7	3.7	30.4605	10.7787	4.09459	0.441343
Barrow	2009-06-05	71.3665	-156.541	87.5	85	90	-1.7	4	30.4605	11.6646	4.09459	0.477617
Barrow	2009-06-05	71.3665	-156.541	97.5	95	100	-1.6	4	28.7202	12.3944	4.13406	0.512392
Barrow	2009-06-05	71.3665	-156.541	102.5	100	105	-1.7	4.7	30.4605	13.7388	4.09459	0.562548
Barrow	2009-06-05	71.3665	-156.541	107.5	105	110	-1.8	4.3	32.1946	11.8574	4.05563	0.480894
Barrow	2009-06-05	71.3665	-156.541	112.5	110	115	-1.8	3.7	32.1946	10.1829	4.05563	0.41298
Barrow	2009-06-05	71.3665	-156.541	117.5	115	120	-1.8	3.8	32.1946	10.4615	4.05563	0.42428
Barrow	2009-06-05	71.3665	-156.541	122.5	120	125	-1.8	4.2	32.1946	11.5779	4.05563	0.469556
Barrow	2009-06-05	71.3665	-156.541	127.5	125	130	-1.8	4.6	32.1946	12.6972	4.05563	0.514951
Barrow	2009-06-05	71.3665	-156.541	132.5	130	135	-1.729	4.4	30.964	12.6334	4.08324	0.515854
Barrow	2009-06-05	71.3665	-156.541	137.5	135	140	-1.658	6.2	29.7303	18.6813	4.11111	0.768009

## Sheet: dD
Study site	Date	Mid-depth (cm)	Upper-depth (cm)	Lower-depth (cm)	Mean CH4 (nM)	δDsample VSMOW	Standard deviation (‰)		Resolution d13C
Cape Evans	2012-09-19	6.75	0	13.5	3.20963	-237.31	1.98772		Mid-depth (cm)	Upper-depth (cm)	Lower-depth (cm)	δDsample VSMOW
Cape Evans	2012-09-19	20.75	13.5	28	4.45034	-313.213	2.07379		12.75	0	25.5	-273.029
Cape Evans	2012-09-19	35.25	28	42.5	2.97143	-224.493	1.98772		38	25.5	50.5	-219.541
Cape Evans	2012-09-19	49.75	42.5	57	2.66069	-181.292	1.98772		66.5	50.5	82.5	-249.669
Cape Evans	2012-09-19	64.25	57	71.5	2.52483	-267.099	2.07379		99	82.5	115.5	-191.165
Cape Evans	2012-09-19	78.75	71.5	86	2.72				123	115.5	130.5	-284.657
Cape Evans	2012-09-19	94.25	86	102.5	2.26364	-187.571	1.98772		138.75	130.5	147	-214.168
Cape Evans	2012-09-19	110.75	102.5	119	2.14242	-196.693	1.98772
Cape Evans	2012-09-19	126.5	119	134	2.17133	-311.428	2.04775
Cape Evans	2012-09-19	141.5	134	149	2.34733	-187.982	2.04775
Cape Evans	2012-11-07	6.25	0	12.5	2.63	-175.057	7.10642		Resolution d13C
Cape Evans	2012-11-07	18.75	12.5	25	2.722	-112.553	2.4671		Mid-depth (cm)	Upper-depth (cm)	Lower-depth (cm)	δDsample VSMOW
Cape Evans	2012-11-07	33.25	25	41.5	2.78758	-113.836	7.10642		12	0	24	-145.107
Cape Evans	2012-11-07	49.75	41.5	58	2.43061	-160.597	4.77524		33.5	24	43	-117.46
Cape Evans	2012-11-07	64.5	58	71	1.75769	-153.042	7.10642		54.5	43	66	-157.969
Cape Evans	2012-11-07	76.75	71	82.5	1.9587	-133.307	4.77524		73.75	66	81.5	-139.673
Cape Evans	2012-11-07	89.5	82.5	96.5	3.29536	-153.931	2.38762		91.5	81.5	101.5	-148.49
Cape Evans	2012-11-07	103.75	96.5	111	3.83034	-136.291	2.38762		111.5	101.5	121.5	-147.168
Cape Evans	2012-11-07	121	111	131	2.6025	-157.009	4.77524		132.75	121.5	144	-145.638
Cape Evans	2012-11-07	138	131	145	2.745	-137.329	2.38762		156.5	144	169	-184.458
Cape Evans	2012-11-07	151.75	145	158.5	2.10111	-172.64	2.38762
Cape Evans	2012-11-07	164.75	158.5	171	3.5975	-204.141	2.38762
Cape Evans	2012-11-30	7.5	0	15	2.45937	-125.492	8.12765
Cape Evans	2012-11-30	38.25	30	46.5	2.6	-180.565	5.3286
Cape Evans	2012-11-30	82.5	75	90	3.79385	-190.24	2.93404
Cape Evans	2012-11-30	129.5	122	137	2.20543	-220.772	5.86808
Cape Evans	2012-11-30	159.5	152	167	3.0372	-284.374	1.47063
Barrow	2009-04-03	8	0	16	4.61198	-205.9	2
Barrow	2009-04-03	22.5	16	29	6.30608	-225.633	2
Barrow	2009-04-03	35.5	29	42	5.605	-245.504	2
Barrow	2009-04-03	48.5	42	55	5.32103	-231.957	2
Barrow	2009-04-03	61.5	55	68	5.36678	-230	2
Barrow	2009-04-03	75	68	82	6.54839	-186.501	2
Barrow	2009-04-03	89	82	96	6.88052	-215.986	2
Barrow	2009-04-03	104	96	112	9.13904	-238.523	2
Barrow	2009-06-05	11.5	0	23	3.97114	-103.665	2
Barrow	2009-06-05	30.5	23	38	5.08959	-164.431	2
Barrow	2009-06-05	45	38	52	5.80313	-210.33	2
Barrow	2009-06-05	59	52	66	5.31461	-208.3	2

## Sheet: d13C
Study site	Date	Mid-depth (cm)	Upper-depth (cm)	Lower-depth (cm)	Mean CH4 (nM)	δ13Csample VPDB	Standard deviation (‰)	Brine volume fraction averaged (%)	CH4 brines (nM)	LN(CH4 brines) (nM)
Cape Evans	2012-09-19	12.75	0	25.5	3.9245	-42.8594	0.35	3.40067	115.404	4.74844
Cape Evans	2012-09-19	38	25.5	50.5	2.84595	-35.3899	0.35	2.77995	102.374	4.62864
Cape Evans	2012-09-19	66.5	50.5	82.5	2.79132	-32.6355	3.5	2.97722	93.7559	4.54069
Cape Evans	2012-09-19	99	82.5	115.5	2.20391	-37.8517	0.35	2.95158	74.6688	4.31306
Cape Evans	2012-09-19	123	115.5	130.5	2.26155	-30.8873	0.35	4.36885	51.7653	3.94672
Cape Evans	2012-09-19	138.75	130.5	147	2.16148	-32.3443	0.35	10.2641	21.0587	3.04731
Cape Evans	2012-11-07	12	0	24	2.67586	-33.9606	0.35	5.5364	48.332	3.87809
Cape Evans	2012-11-07	33.5	24	43	2.91997	-12.9881	0.35	4.32367	67.5345	4.21264
Cape Evans	2012-11-07	54.5	43	66	1.9913	-25.6464	0.35	4.50357	44.216	3.78909
Cape Evans	2012-11-07	73.75	66	81.5	1.80545	-39.0152	0.35	4.20625	42.9231	3.75941
Cape Evans	2012-11-07	91.5	81.5	101.5	3.64841	-31.1548	0.35	4.31092	84.6317	4.43831
Cape Evans	2012-11-07	111.5	101.5	121.5	2.80582	-19.21	0.35	5.23205	53.6275	3.98206
Cape Evans	2012-11-07	132.75	121.5	144	2.68236	-25.4114	0.35	5.95829	45.0189	3.80708
Cape Evans	2012-11-07	156.5	144	169	2.95257	-29.8396	0.35	15.3398	19.2478	2.9574
Cape Evans	2012-11-30	7.5	0	15	2.60024	-46.8471	0.35	10.7711	24.1408	3.1839
Cape Evans	2012-11-30	37.5	30	45	2.29726	-40.612	0.35	11.4681	20.0318	2.99732
Cape Evans	2012-11-30	80.5	73	88	3.90679	-41.625	0.35	12.4775	31.3105	3.44395
Cape Evans	2012-11-30	134.5	127	142	2.25484	-42.6592	0.35	10.1025	22.3198	3.10547
Cape Evans	2012-11-30	164.5	157	172	3.24835	-43.2873	0.35	16.6297	19.5334	2.97213
Barrow	2009-04-03	8	0	16	4.61198	-57.17	0.35	2.72176	169.448	5.13255
Barrow	2009-04-03	22.5	16	29	6.30608	-58.55	0.35	2.00896	313.898	5.74907
Barrow	2009-04-03	35.5	29	42	5.605	-59.03	0.35	2.05624	272.585	5.60795
Barrow	2009-04-03	48.5	42	55	5.32103	-56.7474	0.35	2.23707	237.857	5.47167
Barrow	2009-04-03	61.5	55	68	5.36678	-55.369	0.35	3.10155	173.035	5.15349
Barrow	2009-04-03	75	68	82	6.54839	-55.3201	0.35	3.18598	205.537	5.32563
Barrow	2009-04-03	89	82	96	6.88052	-60.3899	0.35	5.17808	132.878	4.88943
Barrow	2009-04-03	104	96	112	9.13904	-68.5086	0.35	11.6736	78.2882	4.3604
Barrow	2009-05-08	8	0	16	3.65	-54.4	0.35	7.29901	50.0068	3.91216
Barrow	2009-05-08	22.5	16	29	4.364	-57.9955	0.35	6.40737	68.1091	4.22111
Barrow	2009-05-08	35.5	29	42	6.42284	-59.9565	0.35	7.54951	85.0763	4.44355
Barrow	2009-05-08	48.5	42	55	7.32988	-66.3608	0.35	9.20727	79.6097	4.37714
Barrow	2009-05-08	61.5	55	68	6.09861	-61.1722	0.35	10.6711	57.1509	4.0457
Barrow	2009-05-08	74.5	68	81	4.66356	-50.1983	0.35	10.405	44.8205	3.80267
Barrow	2009-05-08	89	81	97	4.42094	-60.5412	0.35	8.8752	49.8123	3.90826
Barrow	2009-05-08	104	97	111	7.93311	-64.6299	0.35	13.7994	57.4888	4.05159
Barrow	2009-05-08		111	127				19.5729
Barrow	2009-06-05	11.5	0	23	3.97114	-48.5332	0.35	23.8551	16.6469	2.81223
Barrow	2009-06-05	30.5	23	38	5.08959	-51.9407	0.35	17.4935	29.0941	3.37054
Barrow	2009-06-05	45	38	52	5.80313	-56.6311	0.35	15.184	38.2187	3.64332
Barrow	2009-06-05	59	52	66	5.31461	-54.0838	0.35	13.4049	39.6466	3.68001
